# Supplementary material
Source: publisher site journal article supplement (https://www.dovepress.com/article/423707)
Supplement: Supplementary file 1 [file get_supplementary_file.php]

Figure S1 Edge characters of the 29-node model

Figure S2 Symptom distribution of the 36-node modela

a: Blue edges have positive weights, and red edges have negative weights. Edge thickness is proportional to the edge weight. Processing: 1P: Think about your deceased parent; 2P: Search for some reason, meaning, or way to make sense of your loss; 3P: Have positive memories of your deceased parent; 5P: Talk about your deceased parent; 7P: Show your feelings about your deceased parent. Avoidance: 4A: Avoid thinking about your deceased parent; 6A: Avoid talking about your deceased parent; 8A: Avoid showing your feelings about your deceased parent. Contexts: H1: Family member; H2: Friends; H3: Community members; H4: Alone. Stigma: Enacted stigma. Control variables: ga.1: wave 1 deliberate grief avoidance; ru.1：wave 1 grief processing; SES: family SES.

For the 36-node model, 169 out of the 630 edges were non-zero, and their mean weight was .021. The maximum drop proportions to retain correlation of 0.7 in at least 95% of the samples was .75 and .75 for edge and strength, respectively. Figure 1 shows the distribution of symptoms. Four bereavement coping items shared non-zero edges with stigma: H4.2P, H2.2P, H3.7P, and H3.8A. Bootstrap analysis detected no significant differences between the four edge weights.
